# Supplementary material
Source: MDPI journal article supplement (https://www.mdpi.com/2071-1050/11/3/645)
Supplement: s1 [file s1]

Supplementary Material

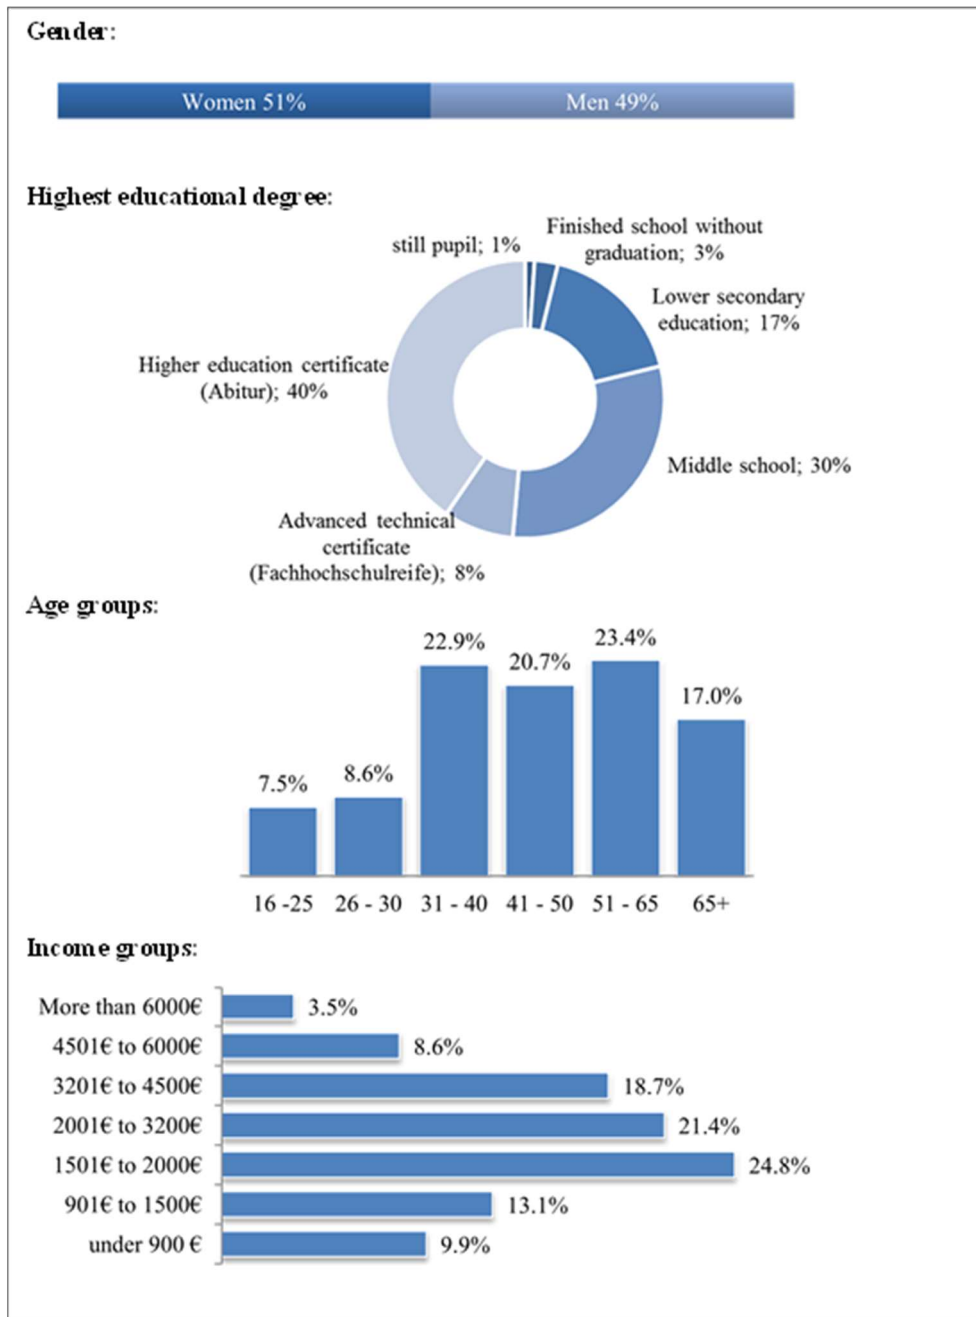

Figure S1. Socio- demographic information of the survey sample; Source: Riechers et al. 2018.

**Table S1.** Categories of cultural ecosystem services (CES) assessed by the corresponding questionnaire items. Translated from German.

| <b>CES</b>         | <b>I visit public green and water spaces in Berlin. 4 point scale of totally agree to totally disagree</b>              |
|--------------------|-------------------------------------------------------------------------------------------------------------------------|
| Aesthetic          | Because you consider the nature in Berlin beautiful                                                                     |
| Nature awareness   | To experience and discover nature and my environment consciously                                                        |
| Education          | To watch and specify animals or to learn about nature                                                                   |
| Inspiration        | Because nature inspires you                                                                                             |
| Cultural diversity | Because nature enables the get together of different people (different age and origin)                                  |
| Social relations   | Because you like to meet people in nature or visit festivities                                                          |
| Sense of place     | Because you connect many memories with Berlin's nature                                                                  |
| Cultural heritage  | Because you cherish the history of the Berlin cultural landscape                                                        |
| Spiritual values   | Because you have an emotional connection to nature                                                                      |
| Recreation         | Because there you can disconnect from the city life and recreate<br>To be active and do sports there                    |
| <b>CES</b>         | <b>How important is it for you (considering green and water spaces in Berlin). 7 point scale of importance (1-7)</b>    |
| Aesthetics         | That you consider those places beautiful                                                                                |
| Spiritual values   | That you have the feeling, that there is something mightier than you                                                    |
| Recreation         | That it is quiet and you can be alone                                                                                   |
| Nature awareness   | That it is enabled, to introduce children to nature                                                                     |
| Education          | That school and kinder gardens can communicate about nature outside                                                     |
| Inspiration        | That nature inspires art and culture                                                                                    |
| Cultural diversity | That all people (independent from age and heritage) have the possibility to use the places according to their ideas.    |
| Social relations   | That you can undertake something with other people outside<br>That you get to know different people and learn from them |
| Sense of place     | That nature helps to feel at home here in Berlin                                                                        |
| Cultural heritage  | That the historical meaning of Berlin's landscape is shown                                                              |
| Recreation         | That you can do different sports there                                                                                  |

Source: Riechers et al. 2018.
